# Supplementary material
Source: ML conference proceedings conference paper supplement (https://openaccess.thecvf.com/content/ICCV_2019/html/Postels_Sampling-Free_Epistemic_Uncertainty_ICCV_2019_paper.html)
Supplement: Supplementary file 1 [file Postels_Sampling-Free_Epistemic_Uncertainty_ICCV_2019_supplemental.zip]

Archive with 3 entries (2 files):
- 1774-supp/
- 1774-supp/VariancePropagation.mp4
- 1774-supp/supplementary.pdf
